# Supplementary material for: Four binuclear coordination polymers with a 63 net and self-assembly of 2D 63 topology into different supramolecular networks using unit–unit H-bonds
Source: Royal Society of Chemistry journal article supplement (doi:10.1039/c5ce00264h), 2015-01-01
Supplement: c5ce00264h1.pdf [file c5ce00264h1.pdf]

**Electronic Supplementary Information for:**

**Four Binuclear Coordination Polymers with  $6^3$  Net and Self-**

**Assembly of 2D  $6^3$  Topology into Different Supramolecular Networks**

**Using Unit-Unit H-Bonds**

Guohai Xu,\* Min Xie, Xiaokang Li,\* Wenjie Shi, Hui Yu, Yinhui Hu, Xiaochen Xun, and Yongrong Xie\*

Key Laboratory of Jiangxi University for Functional Materials Chemistry, School of Chemistry and Chemical Engineering, Gannan Normal University, Ganzhou, Jiangxi 341000, People's Republic of China

E-mail: xugh308@gnnu.cn; gnnulxk@163.com; xieyr@gnnu.edu.cn

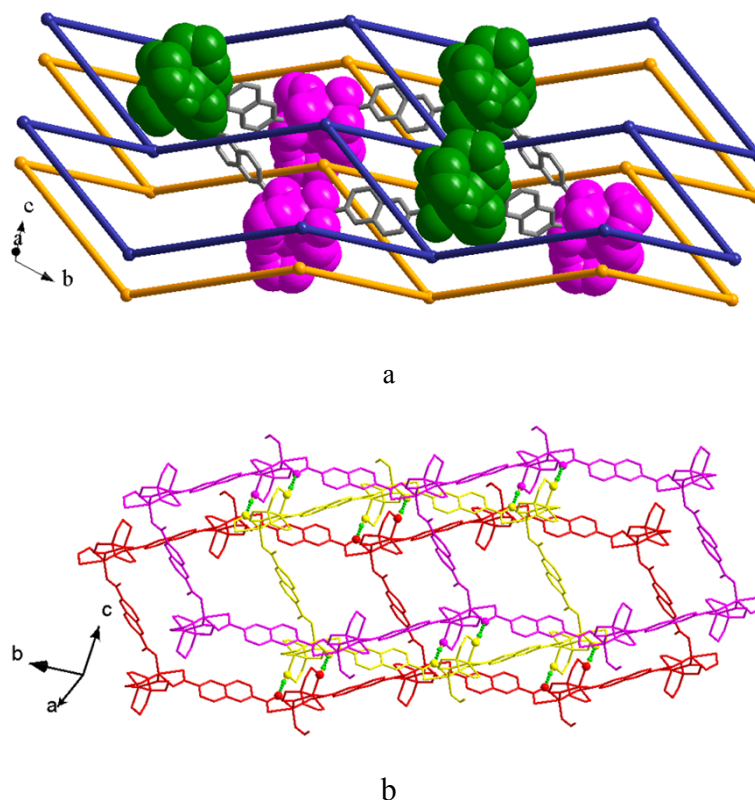

Figure S1. Part structure of **1**: a) the space-filling view of Zn<sub>2</sub> units on each hexagonal window, showing that half (green) fall in the above layer, half (pink) in the below layer; b) the H-bonding interactions among  $6^3$  layers.

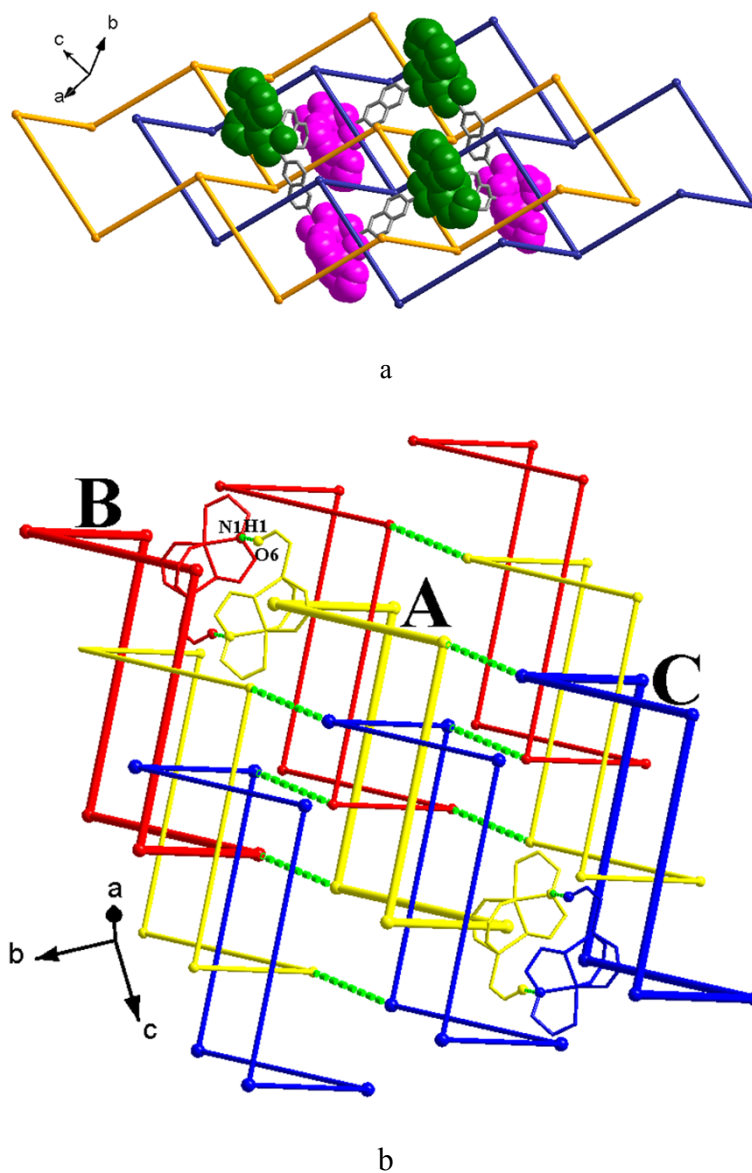

Figure S2. Part structure of **3**: a) the space-filling view of  $Zn_2$  units on each hexagonal window, showing that half (green) fall in one layer of a set of three-fold interpenetrating network, half (pink) in another layer of this set; b) the H-bonding interactions among sets of interpenetrating  $6^3$  layers.

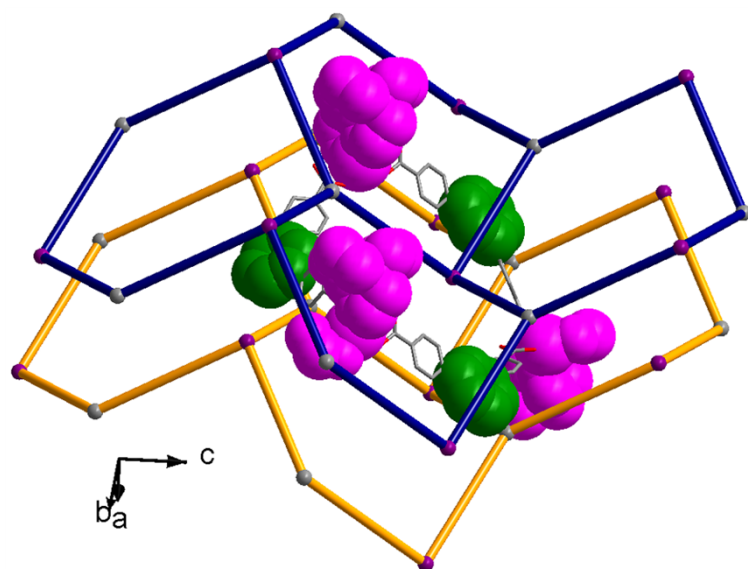

a

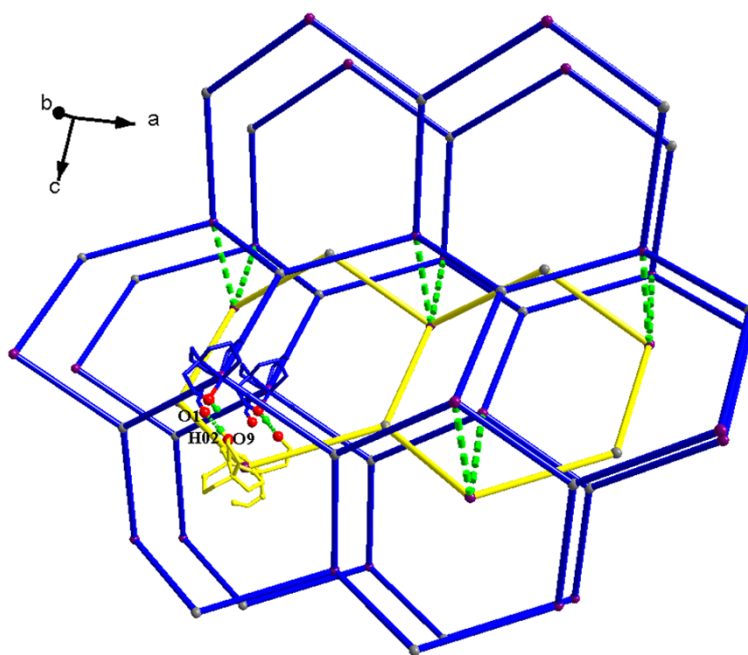

b

Figure S3. Part structure of **4**: a) the space-filling view of Co<sub>2</sub> units on each hexagonal window, showing that two units (pink) fall in the above layer, one unit (pink) in the below layer; b) the H-bonding interactions among 6<sup>3</sup> layers.

Powder X-ray diffraction data were collected using a Bruker D8 Advance (Cu K $\alpha$ 1 radiation,  $\lambda=1.5406$  Å).

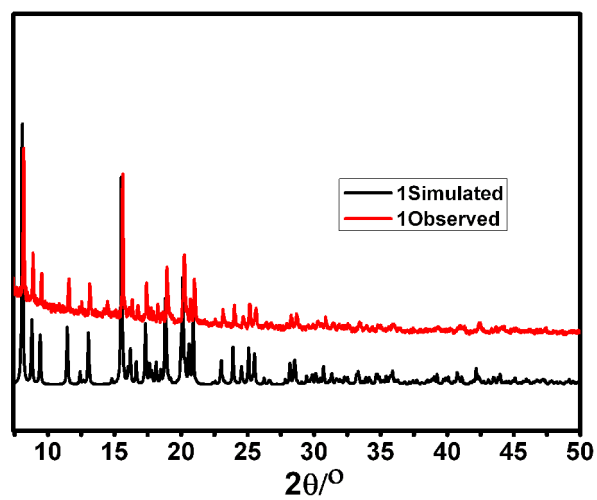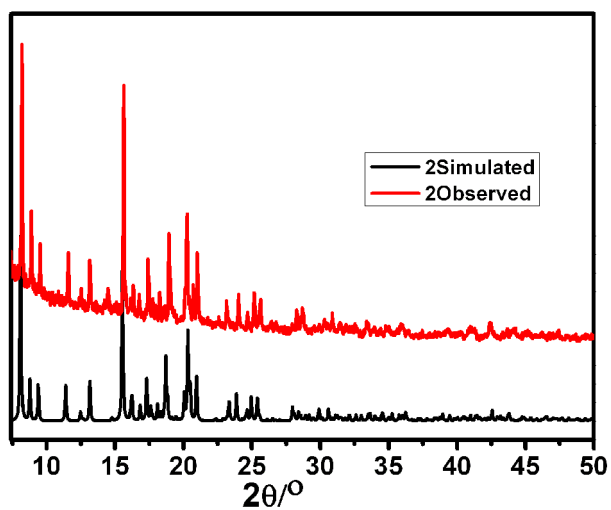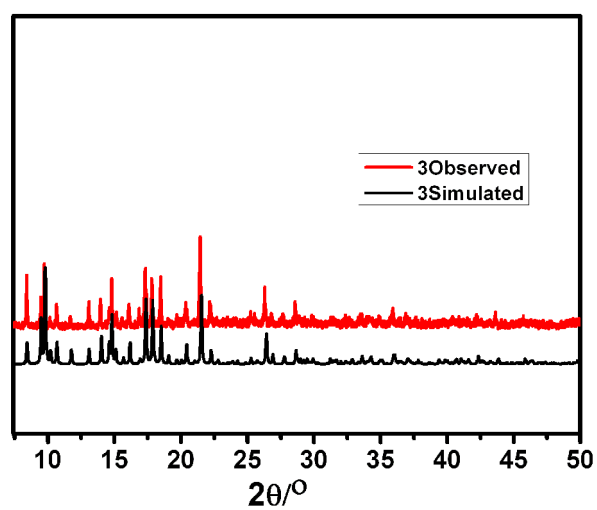

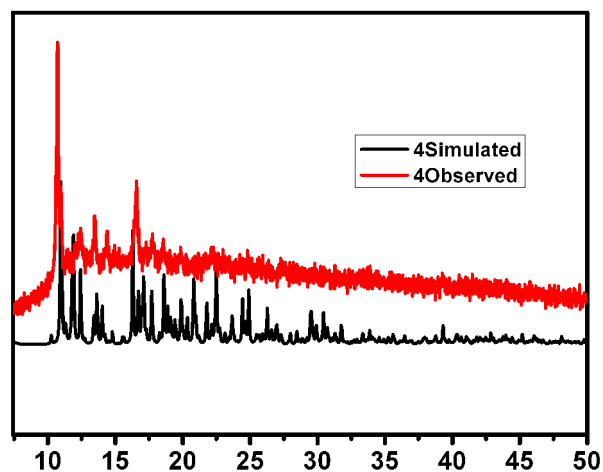

Figure S4. Simulated and observed powder X-ray diffraction patterns of 1-4.

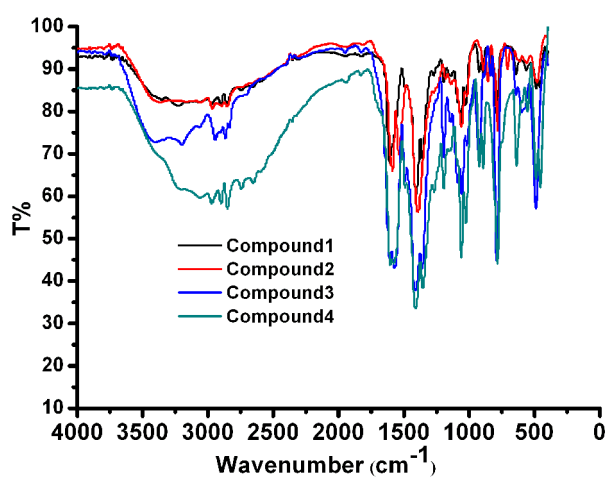

Figure S5. The infrared spectra of 1-4.

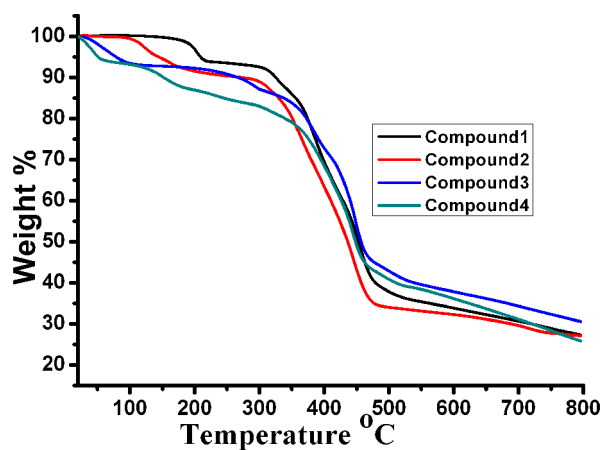

Figure S6. Thermogravimetric analyses of samples 1-4.
